# Supplementary material for: Replicating 3D printed structures into hydrogels
Source: Royal Society of Chemistry journal article supplement (doi:10.1039/c6mh00058d), 2016-01-01
Supplement: c6mh00058d1.pdf [file c6mh00058d1.pdf]

Electronic Supporting information

**Replicating 3D printed structures into hydrogels**

Ho Nam Chan<sup>a,+</sup>, Yiwei Shu<sup>b,+</sup>, Qian Tian<sup>a,c</sup>, Yangfan Chen<sup>a</sup>, Yin Chen<sup>c</sup> and Hongkai Wu<sup>\*,a,c</sup>

<sup>a</sup> *Department of Chemistry, The Hong Kong University of Science and Technology, Clear Water Bay, Kowloon, Hong Kong, China.*

<sup>b</sup> *Division of Life Science & Health, Graduate School at Shenzhen, Tsinghua University, Shenzhen, 518055, China.*

<sup>c</sup> *Division of Biomedical Engineering, The Hong Kong University of Science and Technology, Clear Water Bay, Kowloon, Hong Kong, China.*

\*Email: [chhkwu@ust.hk](mailto:chhkwu@ust.hk), Tel: +852-23587246

## 1 **Materials:**

2        3D printing resin (clear) was purchased from Miicraft, Taiwan. Calcium  
3 sulphate hemihydrate, calcium carbonate with 10  $\mu\text{m}^3$  crystal size, calcium chloride  
4 dihydrate, sodium alginate (medium viscosity), gelatin and alginate lyase were  
5 purchased from Sigma-Aldrich. Calcium carbonate with 1~2  $\mu\text{m}^3$  crystal size was  
6 purchased from BDH (Product no. 275795T). Hydrochloric acid (37%) was purchased  
7 from VWR. Genipin was purchased from Guangxi Shanyun Biochemical Science and  
8 Technology. Agarose, Dulbecco's Modified Eagle Medium (high glucose), penicillin,  
9 streptomycin, fetal bovine serum and life/dead viability kit for mammalian cell were  
10 purchased from Life Technologies. 1% suspension of green fluorescent microbeads was  
11 purchased from Polyscience.

## 13 **3D printing procedures:**

14        All 3D structures were designed in AutoCAD (Autodesk®) and exported in the  
15 file format of .stl. The files were processed by the printer software and the 3D model  
16 was sliced into layers. The thickness of each layers was 100  $\mu\text{m}$  and the pattern on each  
17 layer was projected to the resin chamber with an exposure time of 7 s per layer. After  
18 exposure, the stage of the substrate moved upward for 100  $\mu\text{m}$  to project another pattern  
19 to the resin chamber. The 3D master was printed by repeating these steps sequentially.

20        To clean the uncured resin from the freshly printed master, it was submerged in  
21 ethanol bath for 10 min. After air dried the ethanol, the master was post-cured in the  
22 provided chamber of the printer for 10 min to increase its mechanical strength.

1

## 2 **Replication 3D printed structure into calcium alginate:**

3 To prepare 1.625g of the plaster paste, 0.300 g of calcium sulphate hemihydrate was  
4 mixed with 0.700 g of calcium carbonate followed by mixing with 0.625 g of de-ionized  
5 water. The mixed paste was placed in a centrifugation tube and close packed with the  
6 3D printed structure by centrifugation with 1400 r.c.f. for 30 s. The plaster paste was  
7 partially dried in room temperature for 2 h then placed in an 90°C oven overnight for  
8 complete setting. After taking the mold out of the tube, the mold was heated at 500°C  
9 in a muffle furnace for 2 h to remove the 3D printed template through combustion.  
10 After cooling to room temperature, the cavity was slightly cleaned by a blowgun to  
11 remove the loose hanging calcium residues. Then, 0.01M CaCl<sub>2</sub> solution was pipetted  
12 into the mold with a volume (mL) equal to 25% of the weight of the mold (g). The  
13 solution wetted into the mold quickly. Afterwards, 3% (w/v) sodium alginate solution  
14 was centrifuged into the mold with 1400 r.c.f. for 60 s. Excessive calcium alginate gel  
15 was removed from the outer surface of the mold to expose the CaCO<sub>3</sub> surface.  
16 Afterwards, the mold was submerged in a 2% HCl solution for 1 h to retrieve the casted  
17 alginate. The alginate was further sonicated in a fresh 2% HCl bath for 10 min to  
18 remove any calcium particle stuck on the alginate surface. Finally, the alginate was  
19 washed with de-ionized water three times, and submerged and stored in de-ionized  
20 water.

21

## 22 **Replication 3D printed structure into genipin-crosslinked gelatin:**

1 Gelatin is a derivative of collagen that forms physical gel at room temperature.  
2 Although it is highly biocompatible and cell adhesive, without crosslinking, the gel  
3 melts at physiological temperature and soluble in aqueous medium that limited its cell  
4 culture application. To crosslink gelatin, glutaraldehyde is the commonly used  
5 crosslinker. However, its cytotoxicity is a major concern of its biocompatibility.  
6 Instead, genipin is a natural sourced crosslinker that has much lower cytotoxicity  
7 compared with glutaraldehyde.<sup>1</sup> Therefore, genipin was used to crosslink the gelatin  
8 hydrogel.

9       On the first hand, the plaster mold was firstly prepared as described in previous  
10 section. However, instead of loading controlled amount of CaCl<sub>2</sub> solution, the plaster  
11 mold is submerged in a water bath to fully fill the mold with water. On the other hand,  
12 10% gelatin (w/v) solution was prepared in a 40 °C water bath. Genipin was dissolved  
13 in ethanol (reagent grade, Sigma-Aldrich) to prepare a 20% (w/v) stock solution. The  
14 genipin stock solution was added to the gelatin solution to prepare a final gelatin  
15 mixture that contained 9% gelatin (w/v) and 1.9% genipin (w/v). The mixture was then  
16 pipetted into the cavity of the mold. By cooling to room temperature, the gelatin forms  
17 a physical gel. Afterwards, the gel was placed in a humidified chamber for 24 h to  
18 complete the crosslinking reaction. At this stage, the gelatin turned into deep blue color  
19 that is common for genipin crosslinked protein. Finally, the mold was removed by  
20 submerging in 2% HCl bath for 1 h and was sonicated for 10 min in 2% HCl bath.

21

22 **Fabrication of 3D microfluidic network embedded agarose:**

1 Agarose solution, concentrated DMEM and alginate lyase was warmed and  
2 mixed to prepare a final gel precursor with 3% (w/v) agarose, 10 U/mL alginate lyase  
3 and 1X DMEM. The precursor was poured over the alginate replica and cooled to gel.  
4 The agarose was then incubated at 37 °C for 1.5 h followed by slicing to expose the  
5 inlet and outlet of the microfluidic network. The alginate solution was removed by  
6 suction through the outlet. For the channel visualization, 1% green fluorescent  
7 microbead solution (polyscience) was pipetted into the agarose gel.

8

9 **Fabrication of cell-seeded agarose gel with perfusable channel network:**

10 HepG2 cells were cultured with DMEM, penicillin and streptomycin (100 U), and 10%  
11 fetal bovine serum (FBS) in the petri dish. The cells were cultured for 4 days then  
12 harvested and suspended in fresh DMEM. The suspension was added to the warm  
13 agarose solution and mixed with other components described above to prepare the gel  
14 precursor with 3% agarose, 10 U/mL alginate lyase, 1X DMEM and  $1 \times 10^7$  cells/mL  
15 HepG2. After poured on the alginate replica with a trifurcating network structure and  
16 gelled by cooling, the cell-seeded agarose was incubated at 37°C for 1.5 h to reverse  
17 the gelation of alginate and reduce its viscosity. Then, the head and tail of the incubated  
18 agarose was sliced to expose the inlet and outlet of the microfluidic network. After  
19 removing the alginate solution by suction, DMEM (pre-equilibrated with 5.0 % CO<sub>2</sub>  
20 overnight in the cell incubator) was perfused into the network by a syringe pump at a  
21 flow rate of 2 μL/min for 3 days in a 5.0% CO<sub>2</sub> cell incubator. To assess the cell  
22 viability in the perfused agarose, the agarose was sliced at the middle and stained with

1 live/dead assay solution. For the control, the agarose precursor was prepared with the  
2 same composition and cell density as the agarose used in the perfusion experiment.  
3 Instead, the precursor was poured in a PDMS mold without the alginate template. After  
4 gelled, the agarose was incubated at 37 °C for 1.5 h. It was then placed in DMEM bath  
5 for 3 days inside the cell incubator. To determine the cell viability at the center of the  
6 agarose, it was sliced at the center and stained with live/dead assay. The cell viability  
7 was calculated at the edge and center of the gel.

8

#### 9 **Cell viability assessments:**

10 All of the agarose slices were submerged in a live/dead staining solution (2  $\mu$ M calcein-  
11 AM-green and 4  $\mu$ M ethidium homodimer-1) in the pH-adjusted buffer. The submerged  
12 slices were incubated for 30 min at 37°C and 5.0% CO<sub>2</sub>. Fluorescence images were  
13 acquired with an inverted confocal microscope (Eclipse Ti with D-Eclipse C1, Nikon  
14 Instruments). ImageJ was used for merging of green and red fluorescence images and  
15 counting the live and dead cells.

16

#### 17 **Reference:**

- 18 1. a. Bigi, G. Cojazzi, S. Panzavolta, N. Roveri, and K. Rubini, *Biomaterials*,  
19 2002, **23**, 4827–4832.

20

21

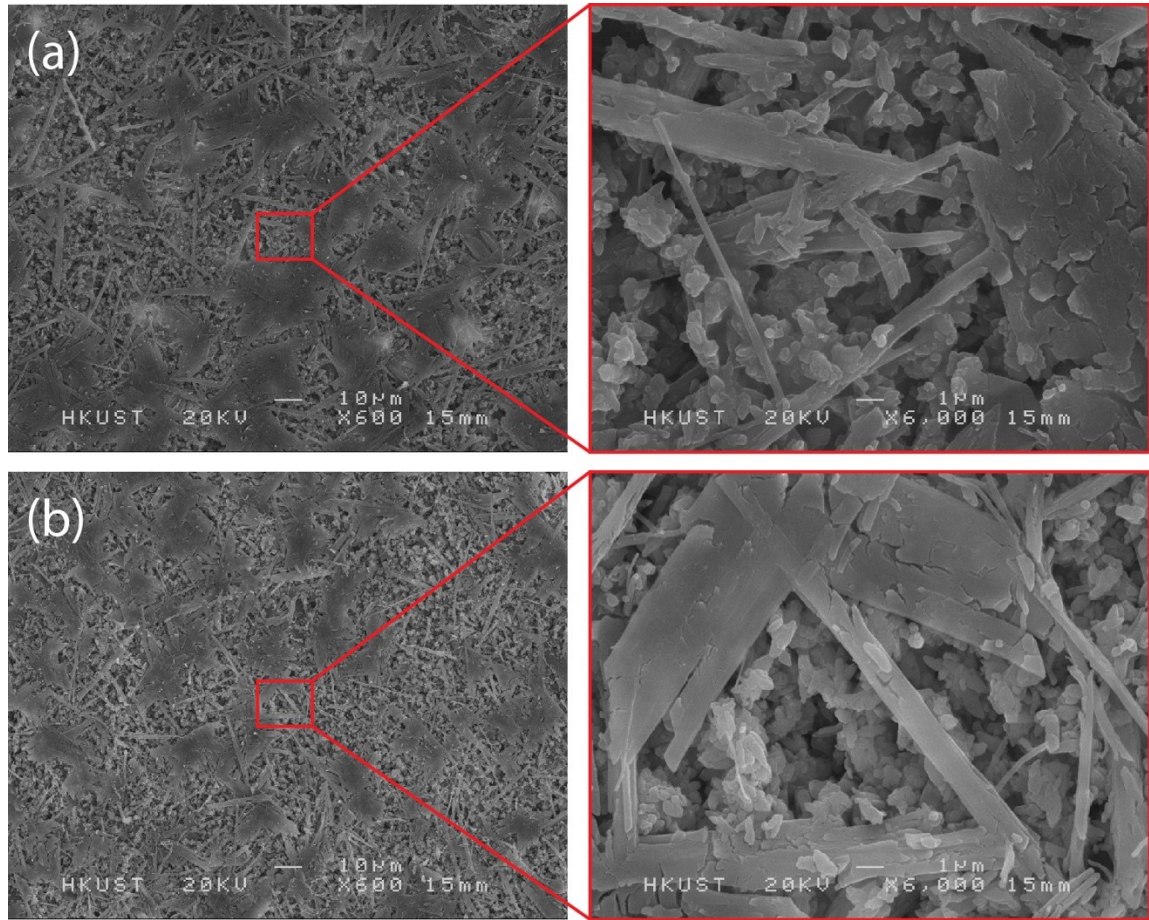

Figure S-1. The SEM image of the plaster mold before (a) and after (b) the heat treatment (500 °C for 2h). The needle and plate crystals are CaSO<sub>4</sub>, while the smaller crystals are CaCO<sub>3</sub>.

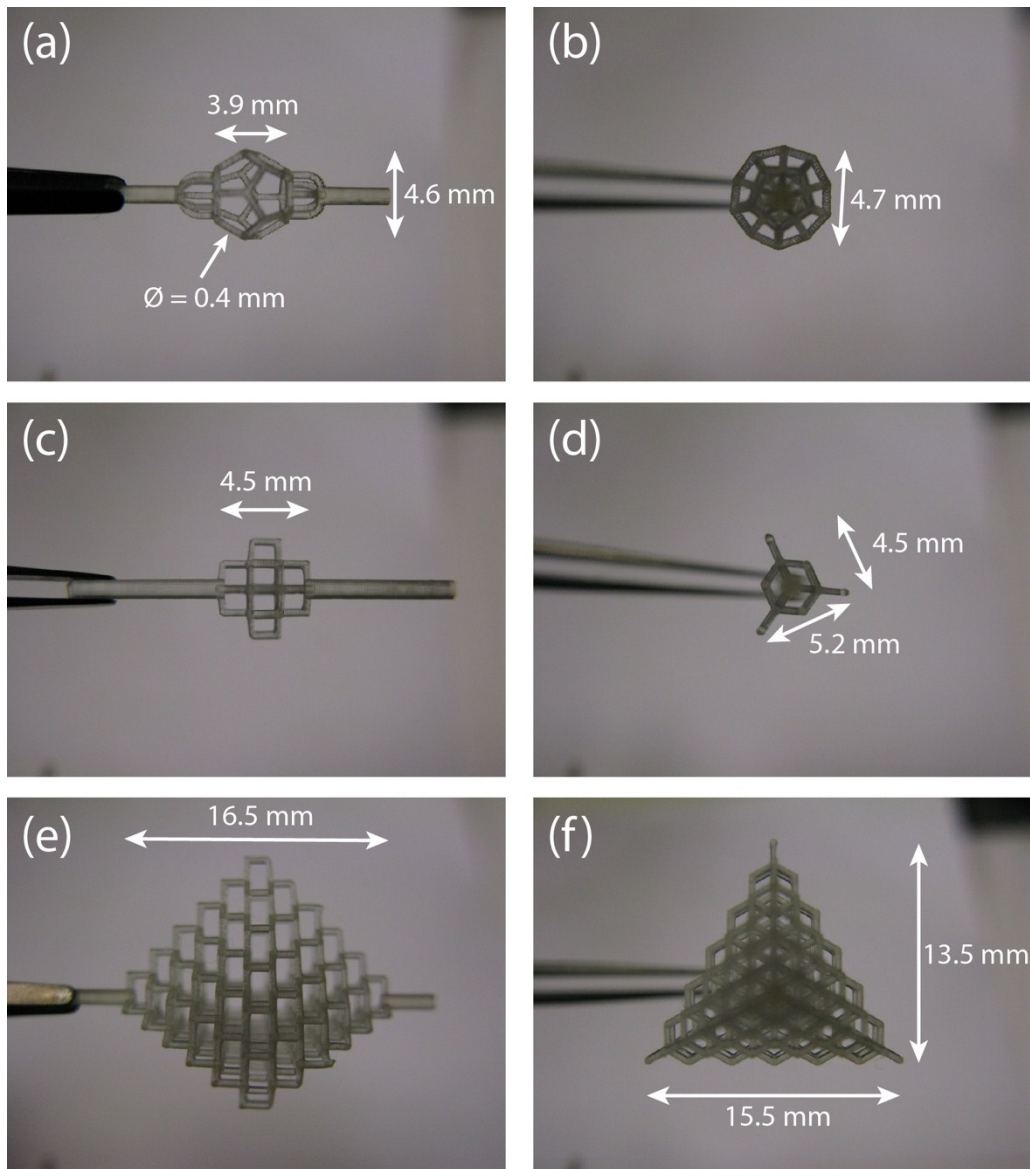

1  
2 Figure S-2. Detailed dimension of the 3D printed masters. The diameter of the arms in  
3 all of the masters are 400  $\mu\text{m}$  as shown in (a). Dodecahedron, side view **(a)**, front view  
4 **(b)**. Trifurcating network, side view **(c)**, front view **(d)**. Scaled trifurcating network,  
5 side view **(e)**, front view **(f)**.  
6
